# Supplementary material
Source: MDPI journal article supplement (https://www.mdpi.com/2073-4344/13/3/521)
Supplement: s1 [file s1]

## Supplementary Materials

**Table S1.** UPLC-MS-MS-identified molecular information for all peptide fragments in the digests of Lf, LfPF complex, and LfPFTG complex

| Sample | Peptide          | Sequence | -10lgP | Mass    | Length | ppm  | m/z     | RT<br>(min) | Area     |
|--------|------------------|----------|--------|---------|--------|------|---------|-------------|----------|
| LfG    | EIYGTKESPQTHY    | 99-111   | 58.6   | 1551.72 | 13     | 0.5  | 776.868 | 16.07       | 3.44E+08 |
|        | AEIYGTKESPQTHY   | 98-111   | 61     | 1622.76 | 14     | 1.9  | 812.388 | 16.12       | 1.49E+09 |
|        | AAEIYGTKESPQTHY  | 97-111   | 39.87  | 1693.79 | 15     | 0.3  | 565.606 | 16.42       | 2.39E+05 |
|        | YKLRPVA          | 91-97    | 30.33  | 845.512 | 7      | 2.3  | 423.764 | 15.05       | 0        |
|        | PYKLRPVAAE       | 90-99    | 40.7   | 1142.64 | 10     | 1.6  | 572.331 | 14.77       | 1.72E+05 |
|        | PYKLRPVAA        | 90-98    | 41     | 1013.6  | 9      | 5.4  | 507.811 | 15.51       | 2.51E+06 |
|        | PYKLRPVA         | 90-97    | 36.5   | 942.565 | 8      | 0.8  | 315.196 | 13.69       | 7.37E+07 |
|        | RDPYKLRPVA       | 88-97    | 34.48  | 1213.69 | 10     | 2.6  | 405.573 | 13.2        | 1.31E+05 |
|        | GRDPYKLRPVAA     | 87-98    | 54.44  | 1341.75 | 12     | 0.7  | 448.258 | 15.51       | 3.11E+05 |
|        | GRDPYKLRPVA      | 87-97    | 50.56  | 1270.71 | 11     | 0.7  | 424.579 | 14.86       | 6.52E+06 |
|        | AGRDPYKLRPVAAE   | 86-99    | 52.97  | 1541.83 | 14     | 0    | 514.951 | 14.7        | 6.08E+05 |
|        | AGRDPYKLRPVAA    | 86-98    | 48.92  | 1412.79 | 13     | 2.3  | 471.938 | 15.49       | 2.97E+06 |
|        | AGRDPYKLRPVA     | 86-97    | 54.7   | 1341.75 | 12     | 0.5  | 448.258 | 14.85       | 5.85E+07 |
|        | AGRDPYKLRPV      | 86-96    | 29.49  | 1270.71 | 11     | 0.8  | 424.579 | 13.79       | 5.72E+05 |
|        | EAGRDPYKLRPVAAE  | 85-99    | 51.74  | 1670.87 | 15     | 1.4  | 557.966 | 16.08       | 3.30E+07 |
|        | EAGRDPYKLRPVAA   | 85-98    | 56.62  | 1541.83 | 14     | 3.2  | 514.953 | 15.66       | 3.32E+08 |
|        | EAGRDPYKLRPVA    | 85-97    | 52.41  | 1470.79 | 13     | -2.2 | 491.271 | 23          | 4.16E+09 |
|        | EAGRDPYKLRPV     | 85-96    | 53.74  | 1399.76 | 12     | 2.3  | 467.594 | 14.82       | 1.51E+07 |
|        | EAGRDPYKL        | 85-93    | 30.28  | 1047.53 | 9      | 2.8  | 524.776 | 14.19       | 2.17E+06 |
|        | FEAGRDPYKLRPVAAE | 84-99    | 60.7   | 1817.94 | 16     | 3.5  | 606.99  | 21.08       | 1.58E+06 |
|        | FEAGRDPYKLRPVAA  | 84-98    | 63.21  | 1688.9  | 15     | 1.3  | 563.975 | 20.74       | 6.77E+07 |
|        | FEAGRDPYKLRPVA   | 84-97    | 56.41  | 1617.86 | 14     | 1    | 540.295 | 22.99       | 1.29E+09 |
|        | FEAGRDPYKLRPVA   | 84-97    | 34.24  | 1659.87 | 14     | -5.3 | 554.295 | 28.88       | 2.27E+06 |
|        | FEAGRDPYKLRPV    | 84-96    | 37.55  | 1546.83 | 13     | 7.1  | 516.619 | 20.29       | 4.87E+06 |
|        | FEAGRDPYKL       | 84-93    | 35.7   | 1194.6  | 10     | 3.7  | 598.311 | 21.48       | 2.97E+06 |
|        | FEAGRDPYK        | 84-92    | 34.17  | 1081.52 | 9      | 1.3  | 541.768 | 10.96       | 1.67E+05 |
|        | VFEAGRDPYKLRPVAA | 83-98    | 52.03  | 1787.97 | 16     | 1.1  | 596.997 | 23.34       | 3.55E+06 |
|        | VFEAGRDPYKLRPVA  | 83-97    | 51.11  | 1716.93 | 15     | 2.1  | 573.319 | 23.12       | 1.14E+08 |
|        | VFEAGRDPYKL      | 83-93    | 46.04  | 1293.67 | 11     | 2.5  | 647.845 | 24.25       | 9.77E+05 |
|        | LGGRPTYEE        | 670-678  | 40.03  | 1020.49 | 9      | 4.2  | 511.253 | 13.19       | 1.20E+06 |
|        | AKLGGRPTYEE      | 668-678  | 34.51  | 1219.62 | 11     | 2.5  | 610.819 | 10.37       | 2.00E+07 |
|        | FKSETKNLL        | 651-659  | 47.93  | 1078.6  | 9      | 2.9  | 540.31  | 15.69       | 1.06E+08 |
|        | LHQQALF          | 631-637  | 30.01  | 855.46  | 7      | 2    | 428.738 | 23.73       | 2.37E+06 |
|        | NLNREDF          | 582-588  | 29.23  | 906.42  | 7      | 1.1  | 454.218 | 16.97       | 8.73E+06 |

|                |         |       |         |    |      |         |       |          |
|----------------|---------|-------|---------|----|------|---------|-------|----------|
| WAKNLNREDF     | 579-588 | 44.16 | 1291.63 | 10 | 2.3  | 646.824 | 20.94 | 1.01E+09 |
| KYYGYTGA       | 541-548 | 42.9  | 921.423 | 8  | 1.6  | 461.72  | 15.94 | 4.28E+07 |
| RTAGWNIPMGLI   | 482-493 | 37.43 | 1327.71 | 12 | 3.3  | 664.863 | 45.66 | 1.57E+07 |
| RTAGWNIPMGL    | 482-492 | 36.38 | 1214.62 | 11 | 3.2  | 608.321 | 42.34 | 5.19E+09 |
| DRTAGWNIPMGL   | 481-492 | 37.58 | 1329.65 | 12 | 3.5  | 665.835 | 45.16 | 3.36E+07 |
| VKKANEGLTW     | 458-467 | 42.45 | 1144.62 | 10 | 1.4  | 573.32  | 17.47 | 5.38E+07 |
| VVKKANEGLTW    | 457-467 | 46.82 | 1243.69 | 11 | 1.4  | 622.854 | 18.55 | 5.13E+08 |
| AVVKKANEGLTW   | 456-467 | 52.5  | 1314.73 | 12 | 2.2  | 658.374 | 19.59 | 1.77E+08 |
| VLRPTEGYL      | 445-453 | 44.24 | 1046.58 | 9  | 1.8  | 524.296 | 26.03 | 2.25E+06 |
| VLRPTEGY       | 445-452 | 44.94 | 933.492 | 8  | 2.5  | 467.754 | 16.19 | 1.54E+06 |
| YTRVVW         | 360-366 | 35.81 | 822.439 | 6  | 3    | 412.228 | 25.25 | 3.22E+05 |
| YLGSRYLT       | 338-345 | 41.12 | 971.508 | 8  | 0.9  | 486.762 | 24.61 | 1.29E+06 |
| RIPSKVDSAL     | 328-337 | 42.11 | 1084.62 | 10 | -0.6 | 543.319 | 14.94 | 7.56E+06 |
| LRIPSKVDSAL    | 327-337 | 59.9  | 1197.71 | 11 | 2.9  | 599.863 | 25.14 | 5.40E+09 |
| LRIPSKVDSA     | 327-336 | 50.9  | 1084.62 | 10 | 1.9  | 543.32  | 15.56 | 9.81E+07 |
| LRIPSKVDS      | 327-335 | 44.7  | 1013.59 | 9  | 0.4  | 507.801 | 14.7  | 4.56E+06 |
| LRIPSKVD       | 327-334 | 32.17 | 926.555 | 8  | 3.1  | 464.286 | 15.14 | 7.39E+06 |
| FLRIPSKVDSAL   | 326-337 | 41.68 | 1344.78 | 12 | 2.1  | 449.267 | 30.55 | 1.15E+07 |
| FLRIPSKVDSA    | 326-336 | 38.04 | 1231.69 | 11 | 2.4  | 411.572 | 22.91 | 1.88E+05 |
| PPGQRDLL       | 311-318 | 37.5  | 894.492 | 8  | 0.2  | 448.254 | 27.47 | 3.24E+06 |
| SPPGQRDLL      | 310-318 | 35.01 | 981.524 | 9  | 1.4  | 491.77  | 27.46 | 0        |
| FGSPPGQRDLLF   | 308-319 | 28.7  | 1332.68 | 12 | 9    | 667.355 | 37.12 | 0        |
| FGSPPGQRDLL    | 308-318 | 54.96 | 1185.61 | 11 | 2.6  | 593.816 | 29.07 | 3.66E+09 |
| FGSPPGQRDL     | 308-317 | 40.71 | 1072.53 | 10 | 3.3  | 537.274 | 19.47 | 8.87E+07 |
| LFGSPPGQRDLL   | 307-318 | 54.95 | 1298.7  | 12 | 2.4  | 650.358 | 35.31 | 2.92E+07 |
| LFGSPPGQRDL    | 307-317 | 40.71 | 1185.61 | 11 | 1.1  | 593.815 | 26.85 | 0        |
| QLFGSPPGQRDLL  | 306-318 | 46.03 | 1426.76 | 13 | 3.5  | 714.388 | 36.37 | 2.45E+07 |
| QLFGSPPGQRDL   | 306-317 | 50.97 | 1313.67 | 12 | 2.8  | 657.846 | 29.43 | 3.82E+06 |
| QLFGSPPGQRD    | 306-316 | 37.21 | 1200.59 | 11 | 1.4  | 601.303 | 21.86 | 1.44E+06 |
| RSVDGKEDLIWKL  | 277-289 | 51.11 | 1557.85 | 13 | 2.4  | 520.292 | 29.03 | 3.19E+06 |
| ARSVDGKEDLIWKL | 276-289 | 51.71 | 1628.89 | 14 | 3.1  | 543.972 | 28.86 | 1.42E+06 |
| DRDQYEL        | 242-248 | 30.59 | 937.414 | 7  | 3.2  | 469.716 | 21.52 | 3.24E+07 |
| PEKADRDQYEL    | 238-248 | 51.34 | 1362.64 | 11 | -0.9 | 682.327 | 14.88 | 5.13E+06 |
| PEKADRDQYE     | 238-247 | 58.05 | 1249.56 | 10 | 2.8  | 625.788 | 14.11 | 5.04E+05 |
| LPEKADRDQYE    | 237-247 | 37.91 | 1362.64 | 11 | 0    | 682.328 | 14.19 | 1.59E+05 |
| ENLPEKADRDQYEL | 235-248 | 52.97 | 1718.81 | 14 | 1.5  | 860.414 | 22.91 | 1.28E+08 |
| ENLPEKADRDQYE  | 235-247 | 47.92 | 1605.73 | 13 | 2.3  | 536.251 | 14.35 | 2.02E+08 |
| ENLPEKADRDQY   | 235-246 | 31.55 | 1476.68 | 12 | 1.6  | 493.236 | 14.08 | 3.97E+07 |
| FENLPEKADRDQ   | 234-245 | 28.89 | 1460.69 | 12 | 2.5  | 487.905 | 14.34 | 7.32E+05 |

|       |                  |         |       |         |    |      |         |       |           |
|-------|------------------|---------|-------|---------|----|------|---------|-------|-----------|
| LfPFG | REPYFGY          | 204-211 | 33.5  | 930.424 | 7  | 3.4  | 466.221 | 27.13 | 3.63E+05  |
|       | SREPYFG          | 203-210 | 32.07 | 854.392 | 7  | 2.1  | 428.204 | 18.82 | 3.95E+08  |
|       | SREPYF           | 203-209 | 31.97 | 797.371 | 6  | 2.3  | 399.694 | 20.24 | 2.61E+08  |
|       | RQAYPNL          | 182-188 | 33.19 | 860.45  | 7  | 2.2  | 431.233 | 18.63 | 6.96E+05  |
|       | RPYLSWTE         | 152-159 | 37.8  | 1050.51 | 8  | 3.2  | 526.266 | 30.78 | 4.56E+07  |
|       | RPYLSWT          | 152-158 | 33.62 | 921.471 | 7  | 2.8  | 461.744 | 30.71 | 1.71E+09  |
|       | RPYLSW           | 152-157 | 33.22 | 820.423 | 6  | 2.2  | 411.22  | 31.69 | 6.88E+08  |
|       | LRPYLSWT         | 151-158 | 28.56 | 1034.55 | 8  | 2    | 518.286 | 34.83 | 1.63E+06  |
|       | ILRPYLSW         | 150-157 | 34.36 | 1046.59 | 8  | 2.2  | 524.304 | 40.27 | 5.27E+06  |
|       | ILRPYL           | 150-155 | 31.56 | 773.48  | 6  | 3    | 387.748 | 28.21 | 7.94E+08  |
|       | GILRPYL          | 149-155 | 31.13 | 830.501 | 7  | 2.5  | 416.259 | 31.62 | 1.30E+07  |
|       | KESPQTHY         | 104-111 | 35.36 | 988.461 | 8  | -0.6 | 495.238 | 15.33 | 1.08E+05  |
|       | TKESPQTHY        | 103-111 | 29.88 | 1089.51 | 9  | -2.7 | 545.76  | 16.08 | 0         |
|       | GTKESPQTHY       | 102-111 | 57.21 | 1146.53 | 10 | 3    | 574.274 | 13.69 | 6.76E+06  |
|       | YGTKESPQTHY      | 101-111 | 63.46 | 1309.59 | 11 | 1.6  | 655.805 | 15.94 | 2.90E+07  |
|       | IYGTKESPQTHY     | 100-111 | 59.87 | 1422.68 | 12 | 1    | 712.347 | 16.22 | 4.27E+08  |
|       | EIYGTKESPQTHY    | 99-111  | 65.69 | 1551.72 | 13 | 4.5  | 776.871 | 16.2  | 485000000 |
|       | AEIYGTKESPQTHY   | 98-111  | 72.09 | 1622.76 | 14 | 2.2  | 812.388 | 16.3  | 1.45E+09  |
|       | YKLRPVA          | 91-97   | 34.1  | 845.512 | 7  | 2.9  | 423.765 | 14.79 | 0         |
|       | PYKLRPVAAE       | 90-99   | 36.74 | 1142.64 | 10 | -0.6 | 572.329 | 14.33 | 714000    |
|       | PYKLRPVAA        | 90-98   | 29.14 | 1013.6  | 9  | -1.2 | 507.808 | 13.72 | 2740000   |
|       | PYKLRPVA         | 90-97   | 39.14 | 942.565 | 8  | 1.4  | 472.291 | 20.12 | 128000000 |
|       | RDPYKLRPVA       | 88-97   | 38.5  | 1213.69 | 10 | 0.2  | 405.572 | 14.62 | 160000    |
|       | GRDPYKLRPVAA     | 87-98   | 47.79 | 1341.75 | 12 | 1.4  | 448.259 | 15.73 | 281000    |
|       | GRDPYKLRPVA      | 87-97   | 54.04 | 1270.71 | 11 | 2.2  | 424.58  | 14.88 | 9600000   |
|       | GRDPYKLRPV       | 87-96   | 39.96 | 1199.68 | 10 | 2.5  | 400.901 | 14.58 | 246000    |
|       | AGRDPYKLRPVAAE   | 86-99   | 49.38 | 1541.83 | 14 | 3.2  | 514.953 | 14.45 | 1720000   |
|       | AGRDPYKLRPVAA    | 86-98   | 56.15 | 1412.79 | 13 | 1.9  | 471.938 | 15.64 | 4680000   |
|       | AGRDPYKLRPVA     | 86-97   | 58.36 | 1341.75 | 12 | 1.4  | 448.259 | 14.88 | 84000000  |
|       | AGRDPYKLRPV      | 86-96   | 46.46 | 1270.71 | 11 | 0.4  | 424.579 | 13.08 | 4960000   |
|       | EAGRDPYKLRPVAAE  | 85-99   | 58.56 | 1670.87 | 15 | 0.6  | 557.966 | 16.2  | 82900000  |
|       | EAGRDPYKLRPVAA   | 85-98   | 63.51 | 1541.83 | 14 | 2.7  | 514.953 | 15.8  | 426000000 |
|       | EAGRDPYKLRPVA    | 85-97   | 54.42 | 1470.79 | 13 | 1.9  | 491.273 | 22.41 | 3.89E+09  |
|       | EAGRDPYKLRPV     | 85-96   | 60.18 | 1399.76 | 12 | 2.4  | 467.594 | 14.8  | 210000000 |
|       | EAGRDPYKLRP      | 85-95   | 35.63 | 1300.69 | 11 | 1.4  | 434.571 | 12.08 | 665000    |
|       | EAGRDPYKL        | 85-93   | 41.69 | 1047.53 | 9  | 2.7  | 524.776 | 13.92 | 4300000   |
|       | FEAGRDPYKLRPVAAE | 84-99   | 70.07 | 1817.94 | 16 | 3    | 606.99  | 20.89 | 4040000   |
|       | FEAGRDPYKLRPVAA  | 84-98   | 66.71 | 1688.9  | 15 | 2.1  | 563.975 | 20.61 | 69300000  |
|       | FEAGRDPYKLRPVA   | 84-97   | 59.88 | 1617.86 | 14 | 4    | 809.942 | 22.43 | 1.01E+09  |

|                    |         |       |         |    |      |         |       |           |
|--------------------|---------|-------|---------|----|------|---------|-------|-----------|
| FEAGRDPYKLRPV      | 84-96   | 60.74 | 1546.83 | 13 | 3.5  | 516.618 | 20.46 | 46700000  |
| FEAGRDPYK          | 84-92   | 41.42 | 1081.52 | 9  | 3.4  | 541.769 | 10.89 | 238000    |
| VFEAGRDPYKLRPVAAE  | 83-99   | 66.44 | 1917.01 | 17 | -0.7 | 640.01  | 22.9  | 824000    |
| VFEAGRDPYKLRPVAA   | 83-98   | 69.21 | 1787.97 | 16 | 2    | 596.998 | 22.65 | 28000000  |
| VFEAGRDPYKLRPV     | 83-97   | 58.21 | 1716.93 | 15 | -1.5 | 573.317 | 22.33 | 244000000 |
| VFEAGRDPYKLRPV     | 83-96   | 53.93 | 1645.89 | 14 | 1.8  | 412.482 | 22.49 | 11600000  |
| DGGMVFEAGRDPYKLRPV | 79-97   | 52.43 | 2077.04 | 19 | -0.7 | 693.354 | 30.87 | 178000    |
| LGGRPTYEE          | 670-678 | 35.98 | 1020.49 | 9  | 2.1  | 511.252 | 12.67 | 3130000   |
| AKLGGRPTYEE        | 668-678 | 47.12 | 1219.62 | 11 | 0.7  | 610.818 | 10.35 | 36500000  |
| FKSETKNLL          | 651-659 | 53.95 | 1078.6  | 9  | 2.2  | 540.31  | 15.72 | 798000000 |
| LFKSETKNLL         | 650-659 | 51.76 | 1191.69 | 10 | 1.9  | 596.852 | 21.82 | 2110000   |
| LHQALF             | 631-637 | 29.36 | 855.46  | 7  | 3.5  | 428.739 | 22.88 | 1770000   |
| NLNREDF            | 582-588 | 32.9  | 906.42  | 7  | 2.4  | 454.218 | 17.08 | 10500000  |
| WAKNLNREDF         | 579-588 | 48.35 | 1291.63 | 10 | 2.3  | 646.824 | 20.51 | 716000000 |
| KYYGYTGA           | 541-548 | 45.62 | 921.423 | 8  | 2.7  | 461.72  | 15.96 | 27100000  |
| RTAGWNIPMGLI       | 482-493 | 39.42 | 1327.71 | 12 | 4    | 664.864 | 45.56 | 5800000   |
| RTAGWNIPMGL        | 482-492 | 39.51 | 1214.62 | 11 | 3.4  | 608.321 | 42.11 | 3.22E+09  |
| DRTAGWNIPMGL       | 481-492 | 40.1  | 1329.65 | 12 | 2.1  | 665.834 | 45.41 | 1.32E+09  |
| VKKANEGLTW         | 458-467 | 50.35 | 1144.62 | 10 | 2.5  | 573.321 | 17.28 | 63400000  |
| VVKKANEGLTW        | 457-467 | 44.42 | 1243.69 | 11 | 2.2  | 622.855 | 18.07 | 482000000 |
| AVVKKANEGLTW       | 456-467 | 54.07 | 1314.73 | 12 | 0.8  | 658.373 | 19.7  | 310000000 |
| VLRPTEGYL          | 445-453 | 37.18 | 1046.58 | 9  | 2.9  | 524.297 | 25.73 | 1450000   |
| VLRPTEGY           | 445-452 | 51.5  | 933.492 | 8  | 2.9  | 467.755 | 16.1  | 1190000   |
| YTRVVW             | 360-366 | 33.17 | 822.439 | 6  | 1.5  | 412.227 | 24.87 | 189000    |
| YLGSRYL            | 338-344 | 30.63 | 870.46  | 7  | 2.7  | 436.238 | 26.24 | 4360000   |
| RIPSKVDSAL         | 328-337 | 46.61 | 1084.62 | 10 | 1.1  | 543.32  | 14.87 | 11000000  |
| LRIPSKVDSAL        | 327-337 | 62.71 | 1197.71 | 11 | 3.2  | 599.863 | 24.68 | 5.5E+09   |
| LRIPSKVDSA         | 327-336 | 53.8  | 1084.62 | 10 | 1.9  | 543.32  | 15.68 | 98100000  |
| LRIPSKVDS          | 327-335 | 42.04 | 1013.59 | 9  | 2.4  | 338.87  | 14.28 | 12800000  |
| LRIPSKVD           | 327-334 | 38.4  | 926.555 | 8  | 1.9  | 309.86  | 14.9  | 13000000  |
| FLRIPSKVDSAL       | 326-337 | 57.48 | 1344.78 | 12 | 2.9  | 449.267 | 29.98 | 10500000  |
| PPGQRDLL           | 311-318 | 41.98 | 894.492 | 8  | 1.6  | 448.254 | 27.23 | 2110000   |
| FGSPPGQRDLL        | 308-318 | 58.79 | 1185.61 | 11 | 3.1  | 593.816 | 28.19 | 2.02E+09  |
| FGSPPGQRDL         | 308-317 | 47    | 1072.53 | 10 | 2.9  | 537.274 | 18.79 | 89400000  |
| LFGSPPGQRDLL       | 307-318 | 56.06 | 1298.7  | 12 | 3.8  | 650.359 | 34.72 | 15700000  |
| LFGSPPGQRDL        | 307-317 | 33.82 | 1185.61 | 11 | 2.1  | 593.816 | 26.95 | 0         |
| QLFGSPPGQRDLL      | 306-318 | 49.31 | 1426.76 | 13 | 3.1  | 714.388 | 36.14 | 11800000  |
| QLFGSPPGQRDL       | 306-317 | 39.27 | 1313.67 | 12 | 2.6  | 657.845 | 28.78 | 2050000   |
| QLFGSPPGQRD        | 306-316 | 36.41 | 1200.59 | 11 | 3.5  | 601.304 | 21.51 | 1170000   |

|         |                  |         |       |         |    |      |         |       |           |
|---------|------------------|---------|-------|---------|----|------|---------|-------|-----------|
|         | SVDGKEDLIWKLLSK  | 278-292 | 64.85 | 1729.96 | 15 | 1    | 577.662 | 40.35 | 1810000   |
|         | RSVDGKEDLIWKLLSK | 277-292 | 49.31 | 1886.06 | 16 | 3    | 472.524 | 34.55 | 207000    |
|         | RSVDGKEDLIWKL    | 277-289 | 54.56 | 1557.85 | 13 | 3    | 520.293 | 28.65 | 4660000   |
|         | ARSVDGKEDLIWKL   | 276-289 | 41.68 | 1628.89 | 14 | 2.5  | 543.972 | 29.07 | 510000    |
|         | DRDQYEL          | 242-248 | 30.37 | 937.414 | 7  | 2.7  | 469.716 | 21.5  | 45100000  |
|         | PEKARDRDQYEL     | 238-248 | 46.51 | 1362.64 | 11 | 1.9  | 682.329 | 14.55 | 9200000   |
|         | PEKARDRDQYE      | 238-247 | 55.84 | 1249.56 | 10 | 0.5  | 625.786 | 13.66 | 575000    |
|         | LPEKARDRDQYE     | 237-247 | 38.59 | 1362.64 | 11 | 0.6  | 682.328 | 13.68 | 264000    |
|         | ENLPEKARDRDQYEL  | 235-248 | 67.76 | 1718.81 | 14 | 3    | 860.415 | 22.33 | 52500000  |
|         | ENLPEKARDRDQYE   | 235-247 | 51.51 | 1605.73 | 13 | 2.6  | 536.251 | 13.72 | 246000000 |
|         | ENLPEKARDRDQY    | 235-246 | 43.9  | 1476.68 | 12 | 1.1  | 493.236 | 13.21 | 57700000  |
|         | FENLPEKARDRDQYE  | 234-247 | 36.17 | 1752.8  | 14 | 4.6  | 855.901 | 22.72 | 179000000 |
|         | FENLPEKARDRDQY   | 234-246 | 42.94 | 1623.75 | 13 | 3.3  | 812.886 | 19.61 | 1090000   |
|         | FENLPEKARDRDQ    | 234-245 | 29.43 | 1460.69 | 12 | 0.5  | 487.904 | 13.92 | 1130000   |
|         | REPYFGY          | 204-211 | 31.94 | 930.424 | 7  | 0.3  | 466.219 | 27.18 | 53100     |
|         | SREPYFG          | 203-210 | 32.21 | 854.392 | 7  | 2.2  | 428.204 | 18.86 | 410000000 |
|         | SREPYF           | 203-209 | 33.31 | 797.371 | 6  | 2    | 399.694 | 19.9  | 275000000 |
|         | RPYLSWTE         | 152-159 | 41.41 | 1050.51 | 8  | 3.7  | 526.266 | 30.43 | 33300000  |
|         | RPYLSWT          | 152-158 | 37.11 | 921.471 | 7  | 1.6  | 461.743 | 29.09 | 1.23E+09  |
|         | RPYLSW           | 152-157 | 33.78 | 820.423 | 6  | 3    | 411.22  | 31.03 | 355000000 |
|         | LRPYLSW          | 151-157 | 31.48 | 933.507 | 7  | 1.1  | 467.761 | 35.61 | 1600000   |
|         | ILRPYLSW         | 150-157 | 43.23 | 1046.59 | 8  | 2.7  | 524.304 | 39.92 | 10000000  |
|         | ILRPYL           | 150-155 | 32.27 | 773.48  | 6  | 2.3  | 387.748 | 26.52 | 830000000 |
|         | GILRPYLSW        | 149-157 | 32.43 | 1103.61 | 9  | 3.3  | 552.816 | 42.65 | 129000    |
|         | GILRPYL          | 149-155 | 33.55 | 830.501 | 7  | 2.8  | 416.259 | 31.22 | 8340000   |
|         | TKESPQTHY        | 103-111 | 30.83 | 1089.51 | 9  | 3    | 545.763 | 33.5  | 1520000   |
|         | GTKESPQTHY       | 102-111 | 56.66 | 1146.53 | 10 | 3.8  | 574.275 | 15.46 | 5650000   |
|         | YGTKESPQTHY      | 101-111 | 66.54 | 1309.59 | 11 | 1.7  | 655.805 | 16.06 | 52200000  |
|         | IYGTKESPQTHY     | 100-111 | 61.94 | 1422.68 | 12 | 1.4  | 712.347 | 16.05 | 582000000 |
| LpPFTGG | EIYGTKESPQTHY    | 99-111  | 64.6  | 1551.72 | 13 | 0.8  | 776.868 | 16.01 | 400000000 |
|         | AEIYGTKESPQTHY   | 98-111  | 67.42 | 1622.76 | 14 | 1.6  | 812.387 | 15.76 | 1.49E+09  |
|         | AAEIYGTKESPQTHY  | 97-111  | 47.63 | 1693.79 | 15 | 2    | 565.607 | 16.24 | 271000    |
|         | YKLRPVA          | 91-97   | 39.88 | 845.512 | 7  | 2.8  | 423.765 | 14.77 | 0         |
|         | PYKLRPVA         | 90-97   | 38.23 | 942.565 | 8  | 0.9  | 472.29  | 14.93 | 35700000  |
|         | DPYKLRPVA        | 89-97   | 36.06 | 1057.59 | 9  | 1.6  | 529.804 | 14.72 | 960000    |
|         | RDPYKLRPVA       | 88-97   | 32.19 | 1213.69 | 10 | -2.4 | 405.571 | 14.72 | 0         |
|         | GRDPYKLRPVAA     | 87-98   | 53.83 | 1341.75 | 12 | 0.1  | 448.258 | 15.5  | 134000    |
|         | GRDPYKLRPVA      | 87-97   | 51.45 | 1270.71 | 11 | 3.2  | 424.58  | 14.93 | 12700000  |
|         | AGRDPYKLRPVAAE   | 86-99   | 39.22 | 1541.83 | 14 | 1.6  | 514.952 | 14.41 | 709000    |

|                  |         |       |         |    |      |         |       |           |
|------------------|---------|-------|---------|----|------|---------|-------|-----------|
| AGRDPYKLRPVAA    | 86-98   | 54.77 | 1412.79 | 13 | 4.7  | 471.939 | 15.47 | 2970000   |
| AGRDPYKLRPVA     | 86-97   | 55.17 | 1341.75 | 12 | 1.3  | 671.884 | 14.64 | 94500000  |
| EAGRDPYKLRPVAAE  | 85-99   | 59.28 | 1670.87 | 15 | 2.1  | 557.966 | 15.69 | 34500000  |
| EAGRDPYKLRPVAA   | 85-98   | 61.42 | 1541.83 | 14 | 4.2  | 514.953 | 15.37 | 233000000 |
| EAGRDPYKLRPVAA   | 85-98   | 35.05 | 1583.84 | 14 | -4.5 | 528.952 | 21.31 | 381000    |
| EAGRDPYKLRPVA    | 85-97   | 54.76 | 1470.79 | 13 | 3.2  | 491.274 | 19.77 | 4.06E+09  |
| EAGRDPYKLRPV     | 85-96   | 53.79 | 1399.76 | 12 | 2.3  | 467.594 | 14.56 | 31400000  |
| EAGRDPYKLRP      | 85-95   | 50.65 | 1300.69 | 11 | 1.8  | 434.571 | 11.72 | 11400000  |
| EAGRDPYKL        | 85-93   | 43.98 | 1047.53 | 9  | 2.4  | 524.776 | 13.93 | 8260000   |
| FEAGRDPYKLRPVAAE | 84-99   | 50.83 | 1817.94 | 16 | 3.1  | 606.99  | 20.99 | 735000    |
| FEAGRDPYKLRPVAA  | 84-98   | 62    | 1688.9  | 15 | 2.5  | 563.975 | 20.65 | 43700000  |
| FEAGRDPYKLRPVA   | 84-97   | 52.71 | 1617.86 | 14 | 2.1  | 540.296 | 20.35 | 815000000 |
| FEAGRDPYKLRPV    | 84-96   | 42.31 | 1546.83 | 13 | 1.4  | 516.617 | 19.84 | 6860000   |
| FEAGRDPYKLRP     | 84-95   | 37.03 | 1447.76 | 12 | 0.9  | 483.593 | 17.74 | 1050000   |
| FEAGRDPYKL       | 84-93   | 36.39 | 1194.6  | 10 | 3    | 598.311 | 21.26 | 2490000   |
| VFEAGRDPYKLRPVAA | 83-98   | 55.82 | 1787.97 | 16 | 2.7  | 596.998 | 22.79 | 1980000   |
| VFEAGRDPYKLRPVA  | 83-97   | 50.65 | 1716.93 | 15 | 2.4  | 573.319 | 22.52 | 33100000  |
| VFEAGRDPYKLRPV   | 83-96   | 34.43 | 1645.89 | 14 | 0.9  | 549.639 | 22.58 | 222000    |
| FKSETKNLL        | 651-659 | 48.37 | 1078.6  | 9  | 2.6  | 540.31  | 15.37 | 322000000 |
| NLNREDF          | 582-588 | 35.53 | 906.42  | 7  | 3.3  | 454.219 | 16.76 | 2140000   |
| WAKNLNREDF       | 579-588 | 45.3  | 1291.63 | 10 | 1.9  | 646.824 | 20.51 | 912000000 |
| KYYGYTGA         | 541-548 | 42.92 | 921.423 | 8  | 2.4  | 461.72  | 15.51 | 21900000  |
| RTAGWNIPMGLI     | 482-493 | 34.77 | 1327.71 | 12 | 2.9  | 664.863 | 45.43 | 8960000   |
| RTAGWNIPMGL      | 482-492 | 34.75 | 1230.62 | 11 | 3.2  | 616.318 | 39.11 | 273000000 |
| DRTAGWNIPMGL     | 481-492 | 36.46 | 1345.64 | 12 | 3.2  | 673.832 | 39.94 | 68600000  |
| VKKANEGLTW       | 458-467 | 46.41 | 1144.62 | 10 | 1.3  | 573.32  | 16.94 | 85100000  |
| VVKKANEGLTW      | 457-467 | 47.54 | 1243.69 | 11 | 2.2  | 622.855 | 17.89 | 551000000 |
| AVVKKANEGLTW     | 456-467 | 53.87 | 1314.73 | 12 | 1.8  | 658.373 | 19.58 | 160000000 |
| YTRVVW           | 360-366 | 32.15 | 822.439 | 6  | 3.7  | 412.228 | 24.78 | 173000    |
| YLGSRYLT         | 338-345 | 37.03 | 971.508 | 8  | 2.8  | 486.763 | 24.26 | 795000    |
| RIPSKVDSAL       | 328-337 | 45.91 | 1084.62 | 10 | 1.8  | 543.32  | 14.6  | 11100000  |
| LRIPSKVDSAL      | 327-337 | 59.71 | 1197.71 | 11 | 2.9  | 599.863 | 24.62 | 5.62E+09  |
| LRIPSKVDSA       | 327-336 | 50.53 | 1084.62 | 10 | 3    | 543.321 | 15.6  | 141000000 |
| LRIPSKVDS        | 327-335 | 35.22 | 1013.59 | 9  | 1.7  | 507.802 | 14.3  | 8750000   |
| LRIPSKVD         | 327-334 | 41.95 | 926.555 | 8  | 2.8  | 464.286 | 14.9  | 12000000  |
| FLRIPSKVDSAL     | 326-337 | 44.62 | 1344.78 | 12 | -0.1 | 673.395 | 29.52 | 3430000   |
| PPGQRDLL         | 311-318 | 36.97 | 894.492 | 8  | 0.5  | 448.254 | 27.3  | 3100000   |
| SPPGQRDLL        | 310-318 | 38.06 | 981.524 | 9  | 0.8  | 491.77  | 27.23 | 59100     |
| FGSPPGQRDLLF     | 308-319 | 34.36 | 1332.68 | 12 | 9.8  | 667.355 | 37    | 0         |

|        |                |         |       |         |    |      |         |       |           |
|--------|----------------|---------|-------|---------|----|------|---------|-------|-----------|
|        | FGSPPGQRDLL    | 308-318 | 55.23 | 1185.61 | 11 | 3.7  | 593.817 | 28.77 | 2.67E+09  |
|        | FGSPPGQRDL     | 308-317 | 44.64 | 1072.53 | 10 | 1.6  | 537.273 | 19.15 | 172000000 |
|        | LFGSPPGQRDLL   | 307-318 | 52.33 | 1298.7  | 12 | 3.6  | 650.359 | 34.78 | 21300000  |
|        | LFGSPPGQRDL    | 307-317 | 39.66 | 1185.61 | 11 | 2.8  | 593.816 | 26.57 | 0         |
|        | QLFGSPPGQRDLL  | 306-318 | 51.97 | 1426.76 | 13 | 3    | 714.388 | 36.01 | 21200000  |
|        | QLFGSPPGQRDL   | 306-317 | 37.69 | 1313.67 | 12 | 3.5  | 657.846 | 28.73 | 5040000   |
|        | QLFGSPPGQRD    | 306-316 | 38.72 | 1200.59 | 11 | 1.7  | 601.303 | 21.69 | 2380000   |
|        | RSVDGKEDLIWKL  | 277-289 | 45.47 | 1557.85 | 13 | 3.6  | 520.293 | 28.52 | 1890000   |
|        | ARSVDGKEDLIWKL | 276-289 | 49.47 | 1628.89 | 14 | 3.9  | 543.972 | 28.42 | 435000    |
|        | DRDQYEL        | 242-248 | 30.89 | 937.414 | 7  | 2.7  | 469.716 | 21.46 | 34000000  |
|        | PEKADRDQYE     | 238-247 | 62.45 | 1249.56 | 10 | 2.2  | 625.787 | 13.79 | 841000    |
|        | LPEKADRDQYE    | 237-247 | 45.33 | 1362.64 | 11 | 1.3  | 682.329 | 13.85 | 477000    |
|        | ENLPEKADRDQYEL | 235-248 | 55.59 | 1718.81 | 14 | 0.6  | 860.413 | 22.53 | 33600000  |
|        | ENLPEKADRDQYE  | 235-247 | 51.83 | 1605.73 | 13 | 1.2  | 803.872 | 13.75 | 365000000 |
|        | ENLPEKADRDQY   | 235-246 | 41.95 | 1476.68 | 12 | 2.8  | 493.237 | 13.54 | 92800000  |
|        | FENLPEKADRDQYE | 234-247 | 36.17 | 1752.8  | 14 | 4.6  | 585.273 | 22.72 | 179000000 |
|        | FENLPEKADRDQY  | 234-246 | 36.69 | 1623.75 | 13 | 0.4  | 542.258 | 19.46 | 503000    |
|        | FENLPEKADRDQ   | 234-245 | 44.71 | 1460.69 | 12 | 1.7  | 731.353 | 14.15 | 2360000   |
|        | SREPYFG        | 203-210 | 31.79 | 854.392 | 7  | 3.5  | 428.205 | 18.76 | 692000000 |
|        | SREPYF         | 203-209 | 34.93 | 797.371 | 6  | 3    | 399.694 | 19.72 | 336000000 |
|        | RQAYPNL        | 182-188 | 34.75 | 860.45  | 7  | 2.5  | 431.234 | 18.07 | 1410000   |
|        | RPYLSWT        | 152-158 | 30.84 | 921.471 | 7  | 2.8  | 461.744 | 31.26 | 0         |
|        | ILRPYLSW       | 150-157 | 39.21 | 1046.59 | 8  | 2.8  | 524.304 | 39.74 | 4420000   |
|        | ILRPYL         | 150-155 | 31.55 | 773.48  | 6  | 3    | 387.748 | 26.8  | 805000000 |
|        | GILRPYL        | 149-155 | 30.6  | 830.501 | 7  | 3.1  | 416.259 | 30.95 | 6760000   |
|        | GTKESPQTHY     | 102-111 | 55.92 | 1146.53 | 10 | -1   | 574.272 | 13.02 | 10100000  |
|        | YGTKESPQTHY    | 101-111 | 63.78 | 1309.59 | 11 | -0.2 | 655.804 | 15.83 | 42100000  |
|        | IYGTKESPQTHY   | 100-111 | 59.13 | 1422.68 | 12 | 1.4  | 712.347 | 12.99 | 927000000 |
| LfGI   | IYGTKESPQTHY   | 100-111 | 41.69 | 1422.68 | 12 | 2.1  | 475.234 | 13.63 | 5.85E+06  |
|        | FGSPPGQRDLL    | 308-318 | 50.9  | 1185.61 | 11 | 0.9  | 593.815 | 27.92 | 4.08E+07  |
|        | LRIPSKVDSAL    | 327-337 | 41.48 | 1197.71 | 11 | 1.2  | 599.862 | 24.47 | 2.72E+07  |
|        | EAGRDPYKLRPVA  | 85-97   | 47.38 | 1470.79 | 13 | 1.7  | 491.273 | 15.24 | 2.79E+07  |
|        | AGRDPYKLRPVA   | 86-97   | 43.86 | 1341.75 | 12 | 0.1  | 448.258 | 15.1  | 8.12E+04  |
|        | EIYGTKESPQTHY  | 99-111  | 43.5  | 1551.72 | 13 | 2.7  | 518.249 | 15.62 | 7.97E+06  |
|        | VFEAGRDPYKL    | 83-93   | 46.04 | 1293.67 | 11 | 2.5  | 647.845 | 24.25 | 9.77E+05  |
| LfPFGI | LRIPSKVDSAL    | 327-337 | 64.37 | 1197.71 | 11 | 1.7  | 599.862 | 24.9  | 8.19E+07  |
|        | RTAGWNIPMGL    | 482-492 | 38.09 | 1214.62 | 11 | 0.9  | 608.319 | 41.59 | 1.44E+07  |
|        | NLNREDF        | 582-588 | 37.22 | 906.42  | 7  | 3    | 454.218 | 17.38 | 9.40E+06  |
|        | FEAGRDPYK      | 84-92   | 34.03 | 1081.52 | 9  | 1.9  | 541.768 | 11.1  | 9.93E+05  |

|          |               |         |       |         |    |     |         |       |          |
|----------|---------------|---------|-------|---------|----|-----|---------|-------|----------|
| LIPFTGGI | EIYGTKESPQTHY | 99-111  | 43.5  | 1551.72 | 13 | 2.7 | 518.249 | 15.62 | 7.97E+06 |
|          | EIYGTKESPQTHY | 99-111  | 43.5  | 1551.72 | 13 | 2.7 | 518.249 | 15.62 | 7.97E+06 |
|          | FEAGRDPYK     | 84-92   | 42.08 | 1081.52 | 9  | 2.6 | 541.768 | 10.81 | 2.71E+05 |
|          | LGGRPTYEE     | 670-678 | 32.54 | 1020.49 | 9  | 2.7 | 511.252 | 12.94 | 2.96E+05 |
|          | RTAGWNIPMGL   | 482-492 | 42.67 | 1214.62 | 11 | 2.2 | 608.32  | 41.3  | 8.84E+06 |
|          | LRIPSKVDSAL   | 327-337 | 52.16 | 1197.71 | 11 | 3.1 | 400.245 | 24.29 | 1.60E+07 |
|          | FGSPPGQRDLL   | 308-318 | 53.72 | 1185.61 | 11 | 3.8 | 593.817 | 27.69 | 1.13E+07 |
|          | ENLPEKADRQY   | 235-246 | 33.57 | 1476.68 | 12 | 1.8 | 493.236 | 13.56 | 2.00E+05 |
|          | FENLPEKADRQYE | 234-247 | 36.17 | 926.414 | 14 | 4.6 | 442.709 | 22.72 | 1.79E+08 |
|          | SREPYF        | 203-209 | 34.79 | 797.371 | 6  | 3.4 | 399.694 | 20.11 | 2.29E+06 |

---

**Table S2.** Peptide fragments found in the digests of Lf, LfPF complex, and LfPFTG complex

| Targeted peptide fragment          | Peptide fragment        | Sequence<br>No | Sample |       |         |                 |
|------------------------------------|-------------------------|----------------|--------|-------|---------|-----------------|
|                                    |                         |                | LfG    | LfPFG | LfPFTGG | GI digests      |
| DGGMVFEAGRDPYKLRPVAAE<br>f (79–99) | VFEAGRDPYKLRPVAA        | 83-98          | +      | +     | +       |                 |
|                                    | VFEAGRDPYKLRPVA         | 83-97          | +      | +     | +       |                 |
|                                    | FEAGRDPYKLRPVAAE        | 84-99          | +      | +     | +       |                 |
|                                    | FEAGRDPYKLRPVAA         | 84-98          | +      | +     | +       |                 |
|                                    | FEAGRDPYKLRPVA          | 84-97          | +      | +     | +       |                 |
|                                    | FEAGRDPYKLRPV           | 84-96          | +      | +     | +       |                 |
|                                    | EAGRDPYKLRPVAAE         | 85-99          | +      | +     | +       |                 |
|                                    | EAGRDPYKLRPVAA          | 85-98          | +      | +     | +       |                 |
|                                    | EAGRDPYKLRPVA           | 85-97          | +      | +     | +       |                 |
|                                    | EAGRDPYKLRPV            | 85-96          | +      | +     | +       |                 |
|                                    | EAGRDPYKL               | 85-93          | +      | +     | +       |                 |
|                                    | AGRDPYKLRPVAAE          | 86-99          | +      | +     | +       |                 |
|                                    | AGRDPYKLRPVAA           | 86-98          | +      | +     | +       |                 |
|                                    | AGRDPYKLRPVA            | 86-97          | +      | +     | +       |                 |
|                                    | GRDPYKLRPVAA            | 87-98          | +      | +     | +       |                 |
|                                    | GRDPYKLRPVA             | 87-97          | +      | +     | +       |                 |
|                                    | RDYKLRPVA               | 88-97          | +      | +     | +       |                 |
|                                    | PYKLRPVA                | 90-97          | +      | +     | +       |                 |
|                                    | YKLRPVA                 | 91-97          | +      | +     | +       |                 |
|                                    |                         |                |        |       |         | LfPFGI(+)       |
|                                    | FEAGRDPYK               | 84-92          | +      | +     |         | LfPFTGGI<br>(+) |
|                                    | FEAGRDPYKL              | 84-93          | +      |       | +       |                 |
|                                    | AGRDPYKLRPV             | 86-96          | +      | +     |         |                 |
|                                    | PYKLRPVAAE              | 90-99          | +      | +     |         |                 |
|                                    | PYKLRPVAA               | 90-98          | +      | +     |         |                 |
|                                    | VFEAGRDPYKLRPV          | 83-96          |        | +     | +       |                 |
|                                    | DGGMVFEAGRDPYKLRPV<br>A | 79-97          |        | +     |         |                 |
|                                    | EAGRDPYKLRP             | 85-95          |        | +     | +       |                 |
|                                    | GRDPYKLRPV              | 87-96          |        | +     |         |                 |
|                                    | VFEAGRDPYKLRPVAAE       | 83-99          |        | +     |         |                 |
|                                    | DPYKLRPVA               | 89-97          |        |       | +       |                 |
|                                    | FEAGRDPYKLRP            | 84-95          |        |       | +       |                 |
|                                    | VFEAGRDPYKL             | 83-93          | +      |       |         |                 |
|                                    |                         |                |        |       |         | LfPFGI(+)       |
| AEIYGTKESPQTHY, f(97-111)          | AEIYGTKESPQTHY          | 97-111         | +      | +     | +       | LfPFTGGI<br>(+) |
|                                    | EIYGTKESPQTHY           | 99-111         | +      | +     | +       | LfGI(+)         |
|                                    | AAEIYGTKESPQTHY         | 98-111         | +      |       | +       |                 |
|                                    | GTKESPQTHY              | 102-111        | +      | +     | +       |                 |

|                                 |                  |         |   |   |   |                 |
|---------------------------------|------------------|---------|---|---|---|-----------------|
|                                 | YGTKESPQTHY      | 101-111 | + | + | + |                 |
|                                 | IYGTKESPQTHY     | 100-111 | + | + | + |                 |
|                                 | TKESPQTHY        | 103-111 | + | + |   |                 |
|                                 | KESPQTHY         | 104-111 | + |   |   |                 |
| GILRPYLSWTE, f(149-159)         | ILRPYLSW         | 150-157 | + | + | + |                 |
|                                 | ILRPYL           | 150-155 | + | + | + |                 |
|                                 | RPYLSWT          | 152-158 | + | + | + |                 |
|                                 | GILRPYL          | 149-155 | + | + | + |                 |
|                                 | RPYLSW           | 152-157 | + | + |   |                 |
|                                 | RPYLSWTE         | 152-159 | + | + |   |                 |
|                                 | LRPYLSWT         | 151-158 | + |   |   |                 |
|                                 | GILRPYLSW        | 149-157 |   | + |   |                 |
|                                 | LRPYLSW          | 151-157 |   | + |   |                 |
| RQAYPNL, f(182-188)             | RQAYPNL          | 182-188 | + |   | + |                 |
| SREPYFGY, f(203-211)            | SREPYFG          | 203-210 | + | + | + |                 |
|                                 | REPYFGY          | 204-211 | + | + |   |                 |
|                                 | SREPYF           | 203-209 | + | + | + | LfPFTGGI<br>(+) |
| FENLPEKADRDQYEL<br>f(234-248)   | FENLPEKADRDQYE   | 234-247 | + | + | + | LfPFTGGI<br>(+) |
|                                 | FENLPEKADRDQY    | 234-246 |   | + | + |                 |
|                                 | FENLPEKADRDQ     | 234-245 | + | + | + |                 |
|                                 | ENLPEKADRDQYEL   | 235-248 | + | + | + |                 |
|                                 | ENLPEKADRDQYE    | 235-247 | + | + | + |                 |
|                                 | ENLPEKADRDQY     | 235-246 | + | + | + | LfPFTGGI<br>(+) |
|                                 | DRDQYEL          | 242-248 | + | + | + |                 |
|                                 | PEKADRDQYEL      | 238-248 | + | + |   |                 |
|                                 | PEKADRDQYE       | 238-247 | + | + | + |                 |
|                                 | LPEKADRDQYE      | 237-247 | + | + | + |                 |
| ARSVDGKEDLIWKLLSK<br>f(276-292) | ARSVDGKEDLIWKL   | 276-289 | + | + | + |                 |
|                                 | SVDGKEDLIWKLLSK  | 278-292 |   | + |   |                 |
|                                 | RSVDGKEDLIWKLLSK | 277-292 |   | + |   |                 |
|                                 | RSVDGKEDLIWKL    | 277-289 | + | + | + |                 |
| QLFGSPPGQRDLLF, f(306-319)      | QLFGSPPGQRD      | 306-316 | + | + | + |                 |
|                                 | QLFGSPPGQRDL     | 306-317 | + | + | + |                 |
|                                 | QLFGSPPGQRDLL    | 306-318 | + | + | + |                 |
|                                 | LFGSPPGQRDL      | 307-317 | + | + | + |                 |
|                                 | LFGSPPGQRDLL     | 307-318 | + | + | + |                 |
|                                 | FGSPPGQRDL       | 308-317 | + | + | + |                 |
|                                 |                  |         |   |   |   | LfGI(+)         |
|                                 | FGSPPGQRDLL      | 308-318 | + | + | + | LfPFTGGI<br>(+) |
|                                 | FGSPPGQRDLLF     | 308-319 | + |   | + |                 |
|                                 |                  |         |   |   |   |                 |

|                                     |              |         |   |   |   |                                     |
|-------------------------------------|--------------|---------|---|---|---|-------------------------------------|
|                                     | SPPGQRDLL    | 310-318 | + |   | + |                                     |
|                                     | PPGQRDLL     | 311-318 | + | + | + |                                     |
| FLRIPSKVDSALYLGSRYLT<br>f (326-345) | FLRIPSKVDSA  | 326-336 | + |   |   |                                     |
|                                     | LRIPSKVDSAL  | 327-337 | + | + | + | LfGI(+)<br>LfPFGI(+)<br>LfPFTGGI(+) |
|                                     | FLRIPSKVDSAL | 326-337 | + | + | + |                                     |
|                                     | LRIPSKVD     | 327-334 | + | + | + |                                     |
|                                     | LRIPSKVDS    | 327-335 | + | + | + |                                     |
|                                     | LRIPSKVDSA   | 327-336 | + | + | + |                                     |
|                                     | RIPSKVDSAL   | 328-337 | + | + | + |                                     |
| YLGSRYLT, f(338-345)                | YLGSRYLT     | 338-345 | + |   | + |                                     |
|                                     | YLGSRYL      | 338-344 |   | + |   |                                     |
| YTRVW, f(360-366)                   | YTRVW        | 360-366 | + | + | + |                                     |
| VLRPTEGYL, f(445-453)               | VLRPTEGY     | 445-452 | + | + |   |                                     |
| AVVKKANEGLTW, f(456-467)            | VLRPTEGYL    | 445-453 | + | + | + |                                     |
|                                     | AVVKKANEGLTW | 456-467 | + | + | + |                                     |
|                                     | VVKKANEGLTW  | 457-467 | + | + | + |                                     |
|                                     | VKKANEGLTW   | 458-467 | + | + | + |                                     |
| DRTAGWNIPMGLI, f(481-493)           | DRTAGWNIPMGL | 481-492 | + | + | + |                                     |
|                                     | RTAGWNIPMGL  | 482-492 | + | + | + | LfPFGI(+)<br>LfPFTGGI(+)            |
|                                     | RTAGWNIPMGLI | 482-493 | + | + | + |                                     |
| KYYGYTGA, f(541-548)                | KYYGYTGA     | 541-548 | + | + | + |                                     |
| WAKNLNREDF, f(579-588)              | WAKNLNREDF   | 579-588 | + | + | + |                                     |
|                                     | NLNREDF      | 582-588 | + | + | + | LfPFGI(+)                           |
| LHQQALF, f(631-637)                 | LHQQALF      | 631-637 | + | + |   |                                     |
| LFKSETKNLL, f(650-659)              | LFKSETKNLL   | 650-659 |   | + |   |                                     |
|                                     | FKSETKNLL    | 651-659 | + | + | + |                                     |
| AKLGGRPTYEE, f(668-678)             | AKLGGRPTYEE  | 668-678 | + | + |   |                                     |
|                                     | LGGRPTYEE    | 670-678 | + | + |   | LfPFTGGI(+)                         |
